# Supplementary material for: Synthesis and characterization of nanostructured bismuth selenide thin films
Source: Royal Society of Chemistry journal article supplement (doi:10.1039/c0dt00840k), 2010-01-01
Supplement: c0dt00840k.pdf [file c0dt00840k.pdf]

**Synthesis and characterization of nanostructured bismuth selenide thin films**

Zhengliang Sun<sup>a,b</sup>, Shengcong Liufu<sup>a</sup>, Xihong Chen<sup>a</sup>, Lidong Chen<sup>a,\*</sup>

<sup>a</sup> State Key Laboratory of High Performance Ceramics and Superfine Microstructure, Shanghai Institute of Ceramics, Chinese Academy of Science, 1295 Dingxi Road, Shanghai 200050, PR China

<sup>b</sup> Graduate School of the Chinese Academy of Science, 19 Yuquan Road, Beijing 100049, PR China

\* Corresponding author. Tel.: +862152412522; fax: +862152413122

E-mail address: [chenlidong@mail.sic.ac.cn](mailto:chenlidong@mail.sic.ac.cn)

The film formed on side A (Figure S1) is composed of two different parts:  $\alpha$  and  $\beta$ . Part  $\alpha$  is composed of coalescent  $\text{Bi}_2\text{Se}_3$  film, which is similar to the structure showing in the Figure 4 in the text. Part  $\beta$  is composed of  $\text{Bi}_2\text{Se}_3$  lamella (assembled into flower structures), which is consistent with the top view showing in the Figure 1 in the text. So the films formed on side A is composed of coalescent  $\text{Bi}_2\text{Se}_3$  film on the interface between the substrate and the solution, and flower-like structures formed throughout the solution. The flower-like structures contains many voids, which will cover the intrinsic transport properties of the coalescent  $\text{Bi}_2\text{Se}_3$  film and deteriorate the thermoelectric performance remarkably. On the other hand, the films formed on side B only contains coalescent  $\text{Bi}_2\text{Se}_3$  film so the discussion in the text is mainly based on the films formed on side B

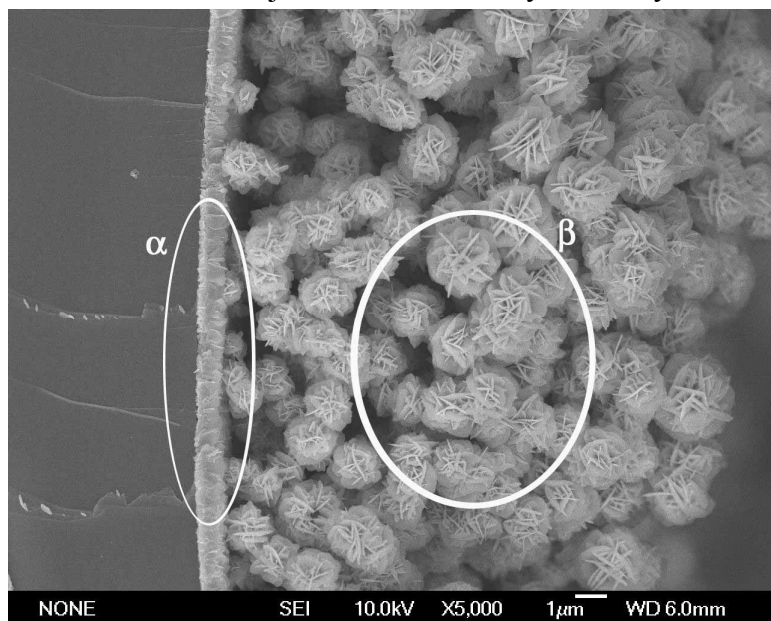

Figure S1 Cross-sectional SEM of the films formed on side A with Bi<sup>3+</sup>/NTA equaling 1:20.
